# Supplementary material for: Triptolide induces protective autophagy through activation of the CaMKKβ-AMPK signaling pathway in prostate cancer cells
Source: PubMed Central journal article supplement (PMC4868692; doi:10.18632/oncotarget.6783), 2015-12-29
Supplement: oncotarget-07-5366-s001.pdf [file oncotarget-07-5366-s001.pdf]

## Triptolide induces protective autophagy through activation of the CaMKK $\beta$ -AMPK signaling pathway in prostate cancer cells

### Supplementary Materials

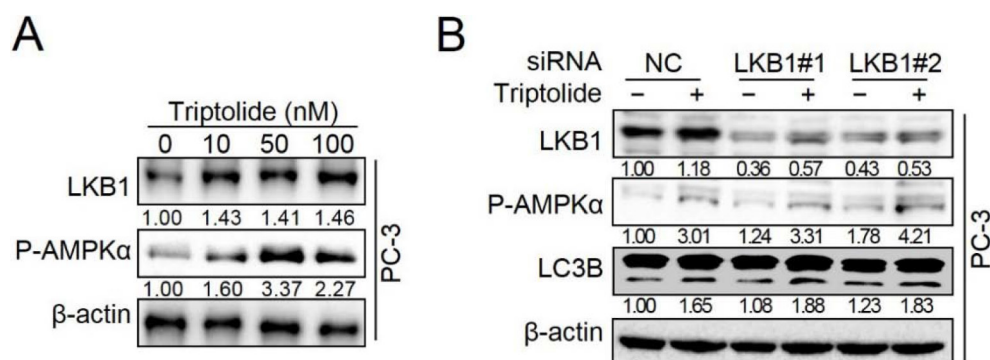

#### Supplementary Figure S1: Triptolide induces LKB1 up-regulation, but not LKB1-mediated AMPK activation.

(A) PC-3 cells were incubated with the indicated concentrations of triptolide for 24 h. Levels of protein expression were analyzed by western blot using antibodies against LKB1, P-AMPK $\alpha$  Thr172 and  $\beta$ -actin. (B) PC-3 cells were transfected with LKB1 siRNA. 24 h later, cells were treated with 50 nM triptolide or DMSO for another 24 h, and then cell lysates were subjected to western blot analysis using antibodies against LKB1, P-AMPK $\alpha$  Thr172, LC3B and  $\beta$ -actin.

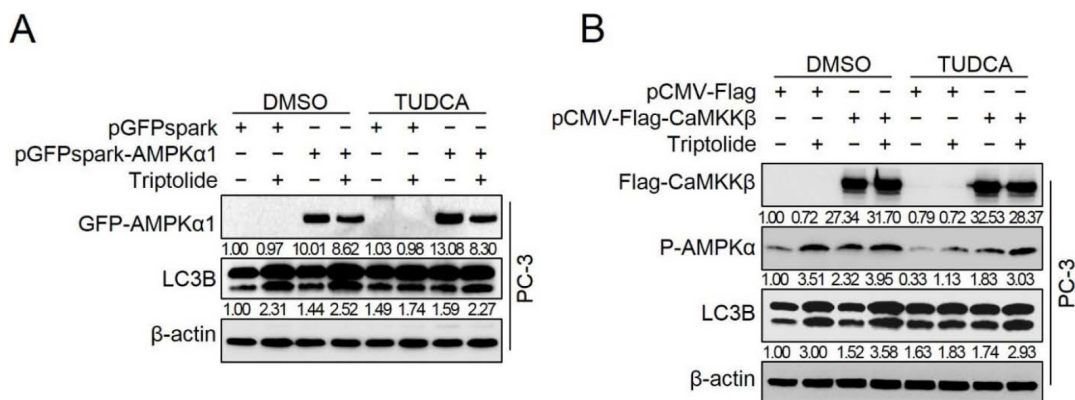

#### Supplementary Figure S2: Overexpression of AMPK $\alpha$ or CaMKK $\beta$ rescues TUDCA induced autophagy inhibition with triptolide treatment.

(A) PC-3 cells were transfected with pGFPspark empty plasmid or pGFPspark-AMPK $\alpha$  plasmid for 24 h, then pretreated with TUDCA (1 mM) for 1 h and treated with 50 nM triptolide for another 24 h. Levels of protein expression were analyzed by western blot using antibodies against GFP, LC3B and  $\beta$ -actin. (B) PC-3 cells were transfected with pCMV-Flag empty plasmid or pCMV-Flag-CaMKK $\beta$  plasmid for 24 h, then pretreated with TUDCA (1 mM) for 1 h and subsequently treated with 50 nM triptolide for another 24 h. Levels of protein expression were analyzed by western blot using antibodies against Flag, P-AMPK $\alpha$ 1 Thr172, LC3B and  $\beta$ -actin.
